# Supplementary material for: Childhood Leukemia and 50 Hz Magnetic Fields: Findings from the Italian SETIL Case-Control Study
Source: PubMed Central journal article supplement (PMC4344719; doi:10.3390/ijerph120202184), 2015-02-16
Supplement: ijerph-12-02184-s001.pdf [file ijerph-12-02184-s001.pdf]

## Childhood Leukemia and 50 Hz Magnetic Fields: Findings from the Italian SETIL Case-Control Study

**Table S1.** Descriptive characteristics of cases and controls included in the unconditional logistic regression models analyses.

|                                                             | Cases |      |       |      | Controls |      |       |      |
|-------------------------------------------------------------|-------|------|-------|------|----------|------|-------|------|
|                                                             | ULR-1 |      | ULR-2 |      | ULR-1    |      | ULR-2 |      |
|                                                             | N°    | %    | N°    | %    | N°       | %    | N°    | %    |
| <b>Sex</b>                                                  |       |      |       |      |          |      |       |      |
| Male                                                        | 281   | 53.8 | 290   | 53.7 | 426      | 54.0 | 447   | 53.9 |
| Female                                                      | 241   | 46.2 | 250   | 46.3 | 363      | 46.0 | 383   | 46.1 |
| <b>Age at diagnosis years</b>                               |       |      |       |      |          |      |       |      |
| [0, 2)                                                      | 71    | 13.6 | 73    | 13.5 | 121      | 15.3 | 131   | 15.8 |
| [2, 4)                                                      | 189   | 36.2 | 196   | 36.3 | 263      | 33.3 | 272   | 32.8 |
| [4, 6)                                                      | 115   | 22.0 | 119   | 22.0 | 170      | 21.6 | 180   | 21.7 |
| [6, 10]                                                     | 147   | 28.2 | 152   | 28.2 | 235      | 29.8 | 247   | 29.8 |
| <b>Father's education</b>                                   |       |      |       |      |          |      |       |      |
| Primary school (8 years)                                    | 255   | 48.8 | 269   | 49.8 | 332      | 42.1 | 359   | 43.3 |
| High school (12-13 years)                                   | 212   | 40.6 | 216   | 40.0 | 331      | 42.0 | 341   | 41.1 |
| University ( $\geq 15$ years)                               | 52    | 10.0 | 52    | 9.6  | 121      | 15.3 | 125   | 15.1 |
| Missing                                                     | 3     | 0.57 | 3     | 0.56 | 5        | 0.63 | 5     | 0.60 |
| <b>Mother's education</b>                                   |       |      |       |      |          |      |       |      |
| Primary school (8 years)                                    | 238   | 45.6 | 252   | 46.7 | 291      | 36.9 | 311   | 37.5 |
| High school (12-13 years)                                   | 226   | 43.3 | 230   | 42.6 | 386      | 48.9 | 405   | 48.8 |
| University ( $\geq 15$ years)                               | 58    | 11.1 | 58    | 10.7 | 112      | 14.2 | 114   | 13.7 |
| Missing                                                     | 0     | -    | 0     | -    | 0        | -    | 0     | -    |
| <b>Children in the family</b>                               |       |      |       |      |          |      |       |      |
| 1                                                           | 144   | 27.6 | 149   | 27.6 | 209      | 26.5 | 228   | 27.5 |
| 2                                                           | 279   | 53.4 | 288   | 53.3 | 436      | 55.3 | 453   | 54.6 |
| 3+                                                          | 99    | 19.0 | 103   | 19.1 | 144      | 18.2 | 149   | 17.9 |
| <b>Mother's smoking (during pregnancy)</b>                  |       |      |       |      |          |      |       |      |
| Yes                                                         | 58    | 11.1 | 59    | 10.9 | 87       | 11.0 | 90    | 10.8 |
| No                                                          | 464   | 88.9 | 481   | 89.1 | 701      | 88.9 | 738   | 88.9 |
| Missing                                                     | 0     | -    | 0     | -    | 1        | 0.13 | 2     | 0.24 |
| <b>Child's exposure to second-hand smoke (at diagnosis)</b> |       |      |       |      |          |      |       |      |
| Yes                                                         | 160   | 30.6 | 168   | 31.1 | 237      | 30.0 | 253   | 30.5 |
| No                                                          | 360   | 69.0 | 370   | 68.5 | 547      | 69.3 | 571   | 68.8 |
| Missing                                                     | 2     | 0.38 | 2     | 0.37 | 5        | 0.63 | 6     | 0.72 |

Table S1. Cont.

|                                                     | Cases |      |       |      | Controls |      |       |      |
|-----------------------------------------------------|-------|------|-------|------|----------|------|-------|------|
|                                                     | ULR-1 |      | ULR-2 |      | ULR-1    |      | ULR-2 |      |
|                                                     | N°    | %    | N°    | %    | N°       | %    | N°    | %    |
| <b>Type of home (at interview and measurements)</b> |       |      |       |      |          |      |       |      |
| Detached house                                      | 127   | 24.3 | 134   | 24.8 | 208      | 26.4 | 225   | 27.1 |
| Apartment building                                  | 388   | 74.3 | 399   | 73.9 | 573      | 72.6 | 597   | 71.9 |
| Missing                                             | 7     | 1.3  | 7     | 1.3  | 8        | 1.0  | 8     | 0.96 |

ULR-1 = first series of unconditional logistic regression analyses including matched and unmatched cases and controls from sets originally strictly matched on age; ULR-2 = second series of unconditional logistic regression analyses including matched and unmatched cases and controls, independent of compliance with the strict age-matching criterion.

**Table S2.** ELF-MF level ( $\mu\text{T}$ ) in the child's bedroom of cases and controls with valid measurements, according to different exposure metrics and methods of non-detect correction.

| Metric | Correction | Cases (# 540) |        |        |       | Controls (# 830) |        |        |       |
|--------|------------|---------------|--------|--------|-------|------------------|--------|--------|-------|
|        |            | Mean          | SD     | Min    | Max   | Mean             | SD     | Min    | Max   |
| AM     | None       | 0.0401        | 0.0865 | 0      | 1.609 | 0.0449           | 0.1208 | 0      | 2.524 |
|        | 0.005      | 0.0412        | 0.0861 | 0.005  | 1.609 | 0.0459           | 0.1205 | 0.005  | 2.524 |
|        | 0.007      | 0.0416        | 0.0860 | 0.007  | 1.609 | 0.0463           | 0.1204 | 0.007  | 2.524 |
| GM     | 0.0001     | 0.0333        | 0.0789 | 0.0001 | 1.485 | 0.0375           | 0.1108 | 0.0001 | 2.499 |
|        | 0.005      | 0.0356        | 0.0782 | 0.005  | 1.485 | 0.0395           | 0.1102 | 0.005  | 2.499 |
|        | 0.007      | 0.0362        | 0.0780 | 0.007  | 1.485 | 0.0400           | 0.1101 | 0.007  | 2.499 |
| P90    | None       | 0.0621        | 0.1329 | 0      | 2.380 | 0.0694           | 0.1564 | 0      | 2.730 |
|        | 0.0001     | 0.0622        | 0.1329 | 0.0001 | 2.380 | 0.0695           | 0.1564 | 0.0001 | 2.730 |
|        | 0.005      | 0.0625        | 0.1327 | 0.005  | 2.380 | 0.0698           | 0.1563 | 0.005  | 2.730 |
|        | 0.007      | 0.0627        | 0.1326 | 0.007  | 2.380 | 0.0699           | 0.1562 | 0.007  | 2.730 |
| P95    | None       | 0.0737        | 0.1585 | 0      | 2.910 | 0.0788           | 0.1651 | 0      | 2.810 |
|        | 0.0001     | 0.0738        | 0.1585 | 0.0001 | 2.910 | 0.0789           | 0.1651 | 0.0001 | 2.810 |
|        | 0.005      | 0.0740        | 0.1584 | 0.005  | 2.910 | 0.0790           | 0.1650 | 0.005  | 2.810 |
|        | 0.007      | 0.0741        | 0.1583 | 0.007  | 2.910 | 0.0791           | 0.1650 | 0.007  | 2.810 |
| P99    | None       | 0.1186        | 0.3445 | 0      | 6.360 | 0.1099           | 0.2080 | 0      | 2.880 |
|        | 0.0001     | 0.1187        | 0.3445 | 0.0001 | 6.360 | 0.1100           | 0.2080 | 0.0001 | 2.880 |
|        | 0.005      | 0.1187        | 0.3444 | 0.005  | 6.360 | 0.1100           | 0.2079 | 0.005  | 2.880 |
|        | 0.007      | 0.1187        | 0.3444 | 0.007  | 6.360 | 0.1100           | 0.2079 | 0.007  | 2.880 |

Valid measurements = made in homes inhabited one year before reference date & duration  $\geq 24$  h; Correction = value assigned to instantaneous measurements below the detection limit (0.01  $\mu\text{T}$ ); AM = arithmetic mean of instantaneous values from 24 to 48 h bedroom measurements; GM = geometric mean of instantaneous values from 24 to 48 h bedroom measurements; P90, P95, P99 = 90th, 95th and 99th percentiles of instantaneous values from 24 to 48 h bedroom measurements.

**Table S3.** Sensitivity analyses: ORs for acute lymphocytic leukemia (ALL) according to ELF-MF exposure (unconditional logistic regression models, adjusted for age, sex, region, and parents' educational level).

| Exposure Metric | Level ( $\mu\text{T}$ )      | ULR-1 |          |      |           | ULR-2 |          |      |           |
|-----------------|------------------------------|-------|----------|------|-----------|-------|----------|------|-----------|
|                 |                              | Cases | Controls | OR   | 95% CI    | Cases | Controls | OR   | 95% CI    |
| AM continuous   | per 1 $\mu\text{T}$ increase | 453   | 680      | 0.98 | 0.23 4.15 | 470   | 719      | 0.79 | 0.19 3.22 |
| AM categorical  | $\leq 0.1$                   | 410   | 626      | 1.00 |           | 423   | 656      | 1.00 |           |
|                 | (0.1–0.2]                    | 30    | 32       | 1.50 | 0.89 2.51 | 34    | 37       | 1.49 | 0.91 2.43 |
|                 | >0.2                         | 13    | 22       | 0.93 | 0.46 1.90 | 13    | 26       | 0.81 | 0.41 1.60 |
| GM categorical  | $\leq 0.1$                   | 419   | 635      | 1.00 |           | 434   | 666      | 1.00 |           |
|                 | (0.1–0.2]                    | 27    | 29       | 1.48 | 0.86 2.56 | 29    | 34       | 1.38 | 0.82 2.32 |
|                 | >0.2                         | 7     | 16       | 0.68 | 0.27 1.68 | 7     | 19       | 0.59 | 0.24 1.42 |
| P95 (3 levels)  | $\leq 0.1$                   | 373   | 547      | 1.00 |           | 385   | 572      | 1.00 |           |
|                 | (0.1–0.2]                    | 42    | 86       | 0.72 | 0.48 1.07 | 43    | 92       | 0.69 | 0.47 1.03 |
|                 | >0.2                         | 38    | 47       | 1.25 | 0.79 1.96 | 42    | 55       | 1.19 | 0.78 1.83 |

ULR-1 = first series of unconditional logistic regression analyses including matched and unmatched cases and controls from sets originally strictly matched on age; ULR-2 = second series of unconditional logistic regression analyses including matched and unmatched cases and controls, independent of compliance with the strict age-matching criterion; AM = arithmetic mean of instantaneous values from individual 24 to 48 h measurements; GM = geometric mean of instantaneous values from individual 24 to 48 h measurements; P95 = 95th percentile of the distribution of values from individual 24 to 48 h measurements.

**Table S4.** Sensitivity analyses: ORs for childhood leukemia (all types), according to nighttime \* ELF-MF exposure (unconditional logistic regression models, adjusted for age, sex, region, and parents' educational level).

| Exposure Metric | Level ( $\mu\text{T}$ )      | ULR-1 |          |      |        | ULR-2 |          |     |        |      |      |
|-----------------|------------------------------|-------|----------|------|--------|-------|----------|-----|--------|------|------|
|                 |                              | Cases | Controls | OR   | 95% CI | Cases | Controls | OR  | 95% CI |      |      |
| AM continuous   | per 1 $\mu\text{T}$ increase | 518   | 784      | 0.60 | 0.19   | 1.82  | 536      | 825 | 0.54   | 0.17 | 1.68 |
| AM categorical  | $\leq 0.1$                   | 475   | 727      | 1.00 |        |       | 492      | 760 | 1.00   |      |      |
|                 | (0.1–0.2]                    | 31    | 35       | 1.41 | 0.85   | 2.33  | 32       | 40  | 1.28   | 0.79 | 2.08 |
|                 | >0.2                         | 12    | 22       | 0.82 | 0.40   | 1.68  | 12       | 25  | 0.73   | 0.36 | 1.49 |
| GM categorical  | $\leq 0.1$                   | 478   | 732      | 1.00 |        |       | 495      | 766 | 1.00   |      |      |
|                 | (0.1–0.2]                    | 33    | 31       | 1.65 | 0.99   | 2.75  | 34       | 35  | 1.52   | 0.93 | 2.49 |
|                 | >0.2                         | 7     | 21       | 0.50 | 0.21   | 1.20  | 7        | 24  | 0.45   | 0.19 | 1.07 |
| P95 (3 levels)  | $\leq 0.1$                   | 448   | 673      | 1.00 |        |       | 461      | 703 | 1.00   |      |      |
|                 | (0.1–0.2]                    | 45    | 66       | 1.07 | 0.72   | 1.61  | 50       | 71  | 1.11   | 0.75 | 1.64 |
|                 | >0.2                         | 25    | 45       | 0.82 | 0.49   | 1.37  | 25       | 51  | 0.74   | 0.45 | 1.23 |
| P95 (4 levels)  | $\leq 0.1$                   | 448   | 673      | 1.00 |        |       | 461      | 703 | 1.00   |      |      |
|                 | (0.1–0.2]                    | 45    | 66       | 1.07 | 0.72   | 1.61  | 50       | 71  | 1.11   | 0.75 | 1.64 |
|                 | (0.2–0.3]                    | 16    | 19       | 1.27 | 0.64   | 2.51  | 16       | 21  | 1.18   | 0.60 | 2.30 |
|                 | >0.3                         | 9     | 26       | 0.51 | 0.23   | 1.10  | 9        | 30  | 0.45   | 0.21 | 0.96 |

Nighttime = 10 pm–5:59 am; ULR-1 = first series of unconditional logistic regression analyses including matched and unmatched cases and controls from sets originally strictly matched on age; ULR-2 = second series of unconditional logistic regression analyses including matched and unmatched cases and controls, independent of compliance with the strict age-matching criterion; AM = arithmetic mean of instantaneous values from individual 24 to 48 h measurements; GM = geometric mean of instantaneous values from individual 24 to 48 h measurements; P95 = 95th percentile of the distribution of values from individual 24 to 48 h measurements.

**Table S5.** Sensitivity analyses: ORs for childhood acute lymphocytic leukemia (ALL) according to nighttime \* ELF-MF exposure (unconditional logistic regression models, adjusted for age, sex, region, and parents' educational level).

| Exposure metric | Level ( $\mu\text{T}$ )      | ULR-1 |          |      |        | ULR-2 |          |     |        |      |      |
|-----------------|------------------------------|-------|----------|------|--------|-------|----------|-----|--------|------|------|
|                 |                              | Cases | Controls | OR   | 95% CI | Cases | Controls | OR  | 95% CI |      |      |
| AM continuous   | per 1 $\mu\text{T}$ increase | 452   | 680      | 0.68 | 0.18   | 2.57  | 469      | 719 | 0.59   | 0.16 | 2.20 |
| AM categorical  | $\leq 0.1$                   | 415   | 630      | 1.00 |        |       | 431      | 661 | 1.00   |      |      |
|                 | (0.1–0.2]                    | 26    | 30       | 1.37 | 0.79   | 2.37  | 27       | 35  | 1.24   | 0.73 | 2.09 |
|                 | >0.2                         | 11    | 20       | 0.82 | 0.39   | 1.75  | 11       | 23  | 0.73   | 0.35 | 1.53 |
| GM categorical  | $\leq 0.1$                   | 416   | 634      | 1.00 |        |       | 432      | 666 | 1.00   |      |      |
|                 | (0.1–0.2]                    | 29    | 27       | 1.66 | 0.96   | 2.86  | 30       | 31  | 1.51   | 0.90 | 2.55 |
|                 | >0.2                         | 7     | 19       | 0.56 | 0.23   | 1.35  | 7        | 22  | 0.50   | 0.21 | 1.18 |
| P95 (3 levels)  | $\leq 0.1$                   | 393   | 582      | 1.00 |        |       | 405      | 610 | 1.00   |      |      |
|                 | (0.1–0.2]                    | 37    | 61       | 0.93 | 0.60   | 1.44  | 42       | 66  | 0.99   | 0.65 | 1.49 |
|                 | >0.2                         | 22    | 37       | 0.88 | 0.51   | 1.53  | 22       | 43  | 0.78   | 0.46 | 1.34 |

Nighttime = 10 pm–5:59 am; ULR-1 = first series of unconditional logistic regression analyses including matched and unmatched cases and controls from sets originally strictly matched on age; ULR-2 = second series of unconditional logistic regression analyses including matched and unmatched cases and controls, independent of compliance with the strict age-matching criterion; AM = arithmetic mean of instantaneous values from individual 24 to 48 h measurements; GM = geometric mean of instantaneous values from individual 24 to 48 h measurements; P95 = 95th percentile of the distribution of values from individual 24 to 48 h measurements.

**Table S6.** Sensitivity analyses—method of non-detect correction: ORs for childhood leukemia (all types), according to ELF-MF exposure (unconditional logistic regression models, adjusted for age, sex, region, and parents' educational level).

| Exposure Metric | Correction | Level ( $\mu\text{T}$ ) | Cases | Controls | OR   | 95% CI |      |
|-----------------|------------|-------------------------|-------|----------|------|--------|------|
| AM              | None       | $\leq 0.1$              | 482   | 753      | 1.00 |        |      |
|                 |            | (0.1–0.2]               | 41    | 43       | 1.55 | 0.99   | 2.44 |
|                 |            | >0.2                    | 14    | 29       | 0.77 | 0.40   | 1.48 |
| AM              | 0.005      | $\leq 0.1$              | 482   | 753      | 1.00 |        |      |
|                 |            | (0.1–0.2]               | 41    | 43       | 1.55 | 0.99   | 2.44 |
|                 |            | >0.2                    | 14    | 29       | 0.77 | 0.40   | 1.48 |
| GM              | 0.0001     | $\leq 0.1$              | 494   | 765      | 1.00 |        |      |
|                 |            | (0.1–0.2]               | 35    | 39       | 1.46 | 0.91   | 2.36 |
|                 |            | >0.2                    | 8     | 21       | 0.60 | 0.26   | 2.36 |
| GM              | 0.005      | $\leq 0.1$              | 493   | 765      | 1.00 |        |      |
|                 |            | (0.1–0.2]               | 36    | 39       | 1.51 | 0.94   | 2.42 |
|                 |            | >0.2                    | 8     | 21       | 0.60 | 0.26   | 1.37 |
| P95             | None       | $\leq 0.1$              | 435   | 659      | 1.00 |        |      |
|                 |            | (0.1–0.2]               | 54    | 101      | 0.81 | 0.57   | 1.16 |
|                 |            | >0.2                    | 48    | 65       | 1.15 | 0.77   | 1.72 |
| P95             | 0.0001     | $\leq 0.1$              | 426   | 643      | 1.00 |        |      |
|                 |            | (0.1–0.2]               | 58    | 111      | 0.78 | 0.55   | 1.10 |
|                 |            | >0.2                    | 53    | 71       | 1.16 | 0.79   | 1.70 |
| P95             | 0.005      | $\leq 0.1$              | 435   | 659      | 1.00 |        |      |
|                 |            | (0.1–0.2]               | 54    | 101      | 0.81 | 0.57   | 1.16 |
|                 |            | >0.2                    | 48    | 65       | 1.15 | 0.77   | 1.72 |

Correction = value assigned to instantaneous measurements below the detection limit (0.01  $\mu\text{T}$ ); AM = arithmetic mean of instantaneous values from individual 24 to 48 h measurements; GM = geometric mean of instantaneous values from individual 24 to 48 h measurements; P95 = 95th percentile of the distribution of values from individual 24 to 48 h measurements.

**Table S7.** Sensitivity analyses—exclusion of six cases with Down syndrome: ORs for childhood leukemia (all types) according to ELF-MF exposure (unconditional logistic regression models, adjusted for age, sex, region, and parents' educational level).

| Exposure Metric | Level ( $\mu\text{T}$ )      | Cases | Controls | OR   | 95% CI |      |
|-----------------|------------------------------|-------|----------|------|--------|------|
| AM continuous   | per 1 $\mu\text{T}$ increase | 534   | 830      | 0.68 | 0.22   | 2.11 |
| AM categorical  | $\leq 0.1$                   | 477   | 753      | 1    | -      | -    |
|                 | (0.1–0.2]                    | 40    | 43       | 1.53 | 0.97   | 2.41 |
|                 | >0.2                         | 14    | 29       | 0.78 | 0.41   | 1.51 |
| GM categorical  | $\leq 0.1$                   | 489   | 756      | 1    | -      | -    |
|                 | (0.1–0.2]                    | 34    | 39       | 1.44 | 0.89   | 2.33 |
|                 | >0.2                         | 8     | 21       | 0.60 | 0.26   | 1.39 |

**Table S7.** *Cont.*

| Exposure Metric | Level ( $\mu\text{T}$ ) | Cases | Controls | OR   | 95% CI |       |
|-----------------|-------------------------|-------|----------|------|--------|-------|
| P95 (3 levels)  | $\leq 0.1$              | 431   | 659      | 1    | -      | -     |
|                 | (0.1–0.2]               | 54    | 101      | 0.82 | 0.58   | 1.176 |
|                 | >0.2                    | 46    | 65       | 1.11 | 0.74   | 1.67  |
| P95 (4 levels)  | $\leq 0.1$              | 431   | 659      | 1    | -      | -     |
|                 | (0.1–0.2]               | 54    | 101      | 0.83 | 0.58   | 1.18  |
|                 | (0.2–0.3]               | 27    | 25       | 1.77 | 1.00   | 3.12  |
|                 | >0.3                    | 19    | 40       | 0.73 | 0.41   | 1.28  |

AM = arithmetic mean of instantaneous values from individual 24 to 48 h measurements; GM = geometric mean of instantaneous values from individual 24 to 48 h measurements; P95 = 95th percentile of the distribution of values from individual 24 to 48 h measurements.

**Table S8.** Sensitivity analyses—further restriction to measurements lasting  $\geq 48$  h: ORs for childhood leukemia (all types) according to ELF-MF exposure (unconditional logistic regression models, adjusted for age, sex, region, and parents' educational level).

| Exposure Metric | Level ( $\mu\text{T}$ )      | Cases | Controls | OR   | 95% CI |      |
|-----------------|------------------------------|-------|----------|------|--------|------|
| AM continuous   | per 1 $\mu\text{T}$ increase | 431   | 652      | 0.63 | 0.19   | 2.13 |
| AM categorical  | $\leq 0.1$                   | 394   | 603      | 1.00 |        |      |
|                 | (0.1–0.2]                    | 29    | 30       | 1.56 | 0.91   | 2.66 |
|                 | >0.2                         | 8     | 19       | 0.64 | 0.27   | 1.49 |
| GM categorical  | $\leq 0.1$                   | 403   | 608      | 1.00 |        |      |
|                 | (0.1–0.2]                    | 24    | 30       | 1.26 | 0.72   | 2.21 |
|                 | >0.2                         | 4     | 14       | 0.43 | 0.14   | 1.34 |
| P95 (3 levels)  | $\leq 0.1$                   | 355   | 531      | 1.00 |        |      |
|                 | (0.1–0.2]                    | 43    | 74       | 0.90 | 0.60   | 1.34 |
|                 | >0.2                         | 33    | 47       | 1.07 | 0.67   | 1.72 |
| P95 (4 levels)  | $\leq 0.1$                   | 355   | 531      | 1.00 |        |      |
|                 | (0.1–0.2]                    | 43    | 74       | 0.90 | 0.60   | 1.35 |
|                 | (0.2–0.3]                    | 18    | 19       | 1.52 | 0.78   | 2.96 |
|                 | >0.3                         | 15    | 28       | 0.78 | 0.41   | 1.50 |

AM = arithmetic mean of instantaneous values from individual 24–48 h measurements; GM = geometric mean of instantaneous values from individual 24 to 48 h measurements; P95 = 95th percentile of the distribution of values from individual 24 to 48 h measurements.

**Table S9.** Sensitivity analyses—further restriction to measurements with sampling interval of 30 s: ORs for childhood leukemia (all types) according to ELF-MF exposure (unconditional logistic regression models, adjusted for age, sex, region, and parents' educational level).

| Exposure Metric | Level ( $\mu\text{T}$ )      | Cases | Controls | OR   | 95% CI |      |
|-----------------|------------------------------|-------|----------|------|--------|------|
| AM continuous   | per 1 $\mu\text{T}$ increase | 531   | 822      | 0.66 | 0.21   | 2.05 |
| AM categorical  | $\leq 0.1$                   | 477   | 750      | 1.00 |        |      |
|                 | (0.1–0.2]                    | 41    | 43       | 1.56 | 0.99   | 2.45 |
|                 | >0.2                         | 13    | 29       | 0.72 | 0.37   | 1.41 |
| GM categorical  | $\leq 0.1$                   | 489   | 762      | 1.00 |        |      |
|                 | (0.1–0.2]                    | 34    | 39       | 1.43 | 0.88   | 2.31 |
|                 | >0.2                         | 8     | 21       | 0.60 | 0.26   | 1.37 |
| P95 (3 levels)  | $\leq 0.1$                   | 430   | 656      | 1.00 |        |      |
|                 | (0.1–0.2]                    | 53    | 101      | 0.80 | 0.56   | 1.15 |
|                 | >0.2                         | 48    | 65       | 1.16 | 0.78   | 1.72 |
| P95 (4 levels)  | $\leq 0.1$                   | 430   | 656      | 1.00 |        |      |
|                 | (0.1–0.2]                    | 53    | 101      | 0.81 | 0.56   | 1.15 |
|                 | (0.2–0.3]                    | 28    | 25       | 1.82 | 1.03   | 3.19 |
|                 | >0.3                         | 20    | 40       | 0.76 | 0.44   | 1.33 |

AM = arithmetic mean of instantaneous values from individual 24 to 48 h measurements; GM = geometric mean of instantaneous values from individual 24 to 48 h measurements; P95 = 95th percentile of the distribution of values from individual 24 to 48 h measurements.

**Table S10.** Sensitivity analyses—further restriction to measurements made during the week-end: ORs for childhood leukemia (all types) according to ELF-MF exposure (unconditional logistic regression models, adjusted for age, sex, region, and parents' educational level).

| Exposure Metric | Level ( $\mu\text{T}$ )      | Cases | Controls | OR   | 95% CI |      |
|-----------------|------------------------------|-------|----------|------|--------|------|
| AM continuous   | per 1 $\mu\text{T}$ increase | 309   | 450      | 0.94 | 0.27   | 3.27 |
| AM categorical  | $\leq 0.1$                   | 279   | 415      | 1.00 |        |      |
|                 | (0.1–0.2]                    | 21    | 23       | 1.42 | 0.76   | 2.66 |
|                 | >0.2                         | 9     | 12       | 1.14 | 0.47   | 2.78 |
| GM categorical  | $\leq 0.1$                   | 280   | 418      | 1.00 |        |      |
|                 | (0.1–0.2]                    | 25    | 22       | 1.78 | 0.97   | 3.26 |
|                 | >0.2                         | 4     | 10       | 0.64 | 0.19   | 2.09 |
| P95 (3 levels)  | $\leq 0.1$                   | 259   | 367      | 1.00 |        |      |
|                 | (0.1–0.2]                    | 25    | 45       | 0.78 | 0.46   | 1.32 |
|                 | >0.2                         | 25    | 38       | 0.95 | 0.55   | 1.64 |



Table S10. Cont.

| Exposure Metric | Level ( $\mu\text{T}$ ) | Cases | Controls | OR   | 95% CI |      |
|-----------------|-------------------------|-------|----------|------|--------|------|
| P95 (4 levels)  | $\leq 0.1$              | 259   | 367      | 1.00 |        |      |
|                 | (0.1–0.2]               | 25    | 45       | 0.79 | 0.47   | 1.33 |
|                 | (0.2–0.3]               | 16    | 15       | 1.61 | 0.76   | 3.39 |
|                 | $> 0.3$                 | 9     | 23       | 0.56 | 0.25   | 1.23 |

AM = arithmetic mean of instantaneous values from individual 24 to 48 h measurements; GM = geometric mean of instantaneous values from individual 24 to 48 h measurements; P95 = 95th percentile of the distribution of values from individual 24 to 48 h measurements.

© 2015 by the authors; licensee MDPI, Basel, Switzerland. This article is an open access article distributed under the terms and conditions of the Creative Commons Attribution license (<http://creativecommons.org/licenses/by/4.0/>).
